# Supplementary material for: Factors Associated with Mortality and Amputation Caused by Necrotizing Soft Tissue Infections of the Upper Extremity: A Retrospective Cohort Study
Source: Springer Nature journal article supplement (doi:10.1007/s00268-019-05256-9), 2019-10-29
Supplement: MOESM1 [file 17326628]

**Appendix 1 Isolated organisms from cultures of necrotizing soft tissue infections of the upper extremity**

|  | **Total n = 122 (100 %)** | **Died ≤ 30 days n = 13 (11%)** | ***p -* value** | **Amputation n = 17 (14%)** | ***p* - value** |
| --- | --- | --- | --- | --- | --- |
| **Patients with specific isolated organisms from cultures, n (%)** | 109 (89) | 11 (85) |  | 16 (94) |  |
| Group A beta-hemolytic Streptococcus | 48 (44) | 3 (6) | 0.341 | 6 (12.5) | 0.600 |
| Other *Streptococcus* speciesa | 28 (26) | 3 (11) | 1.000 | 4 (14) | 1.000 |
| Staphylococcus species |  |  |  |  |  |
| Methicillin-resistant *Staphylococcus aureus* (MRSA) | 17 (16) | 2 (12) | 0.681 | 2 (12) | 1.000 |
| Methicillin-susceptible *Staphylococcus aureus* (MSSA) | 5 (5) | 0 (0) | 1.000 | 1 (20) | 0.555 |
| Coagulase-Negative Staphylococci (CoNS) | 10 (9) | 1 (10) | 1.000 | 2 (20) | 0.639 |
| Anaerobes other than *Clostridium*b | 19 (17) | 2 (11) | 1.000 | 2 (11) | 0.733 |
| *Clostridium* spp*.* | 6 (6) | 1 (17) | 0.480 | 1 (17) | 1.000 |
| *Vibrio* spp. | 2 (2) | 0 (0) | 1.000 | 1 (50) | 0.273 |
| *Enterococci* spp. | 5 (5) | 2 (40) | 0.079 | 2 (40) | 0.155 |
| *Klebsiella* spp. | 3 (3) | 1 (33) | 0.276 | 0 (0) | 1.000 |
| *Pseudomonas* spp. | 1 (1) | 1 (100) | 0.101 | 1 (100) | 0.147 |
| Otherc | 2 (2) | 0 (0) | 1.000 | 0 (0) | 1.000 |
| **No growth or no cultures taken** | 13 (11) | 2 (15) |  | 1 (6) |  |
| a Includes Group B/C/F/G Streptococcus, *Streptococcus milleri, Streptococcus pneumoniae* b Includes *Fusobacterium spp., Lactobacillus spp., Peptostreptococus spp., Proteus spp., Veillonella spp., Haemophilus parainfluenzae, Actinomyces odontolyticus, Granulicatella adiacens, Pasteurella multocida, Eubacterium lentum* c Include Nocardia asteroides and Neisseria meningitidis  Abbreviations: NA = Not Applicable | | | | | |
|  | | | | | |
