# Supplementary material for: Factors Associated with Mortality and Amputation Caused by Necrotizing Soft Tissue Infections of the Upper Extremity: A Retrospective Cohort Study
Source: Springer Nature journal article supplement (doi:10.1007/s00268-019-05256-9), 2019-10-29
Supplement: MOESM2 [file 17326628]

**Appendix 2 Surgical procedures performed in patients with necrotizing soft tissue infections of the upper extremity**

|  | **Total  n = 122 (100%)** | **Died ≤ 30 days**  **n = 14 (11%)** | **Survived**  **n = 108 (89%)** | ***p -* value** | **Amputation**  **n = 17 (14%)** | **Limb salvage**  **n = 105 (86%)** | ***p* - value** |
| --- | --- | --- | --- | --- | --- | --- | --- |
| **Number of total operative procedures for NSTI, median (IQR)** | 4 (3 - 6) | 1 (1 - 1) | 4 (3 - 6) | **<0.001** | 4 (3 - 5) | 4 (3 - 6) | 0.745 |
| **Number of total operative procedures on the upper extremity for NSTI, median (IQR)** | 4 (3 - 6) | 1 (0 - 1) | 4 (3 - 6) | **<0.001** | 4 (3 - 4) | 4 (3 - 6) | 0.822 |
| Debridement and irrigation procedures, median (IQR) | 3 (2 - 4) | 1 (0 - 1) | 3 (2 - 5) | **<0.001** | 3 (2 - 4) | 3 (2 - 4) | 0.517 |
| Reconstruction procedures, median (IQR) | 1 (1 - 2) | 0 (0 - 0) | 1 (1 - 2) | **<0.001** | 1 (0 - 1) | 1 (1 - 2) | 0.060 |
| **Time from onset symptoms to last surgery for NSTI in weeksa, median (IQR)** | 2 (1 - 6) | 0 (0 - 0) | 2 (1 - 8) | **<0.001** | 1 (0 - 15) | 2 (1 - 6) | 0.233 |
| Abbreviations: IQR = Interquartile Range; NA= Not Applicable; NSTI = Necrotizing Soft Tissue Infection. Missing cases: a4 missing. | | | | | | | |
